# Supplementary material
Source: HighWire-hosted journal article supplement (https://sti.bmj.com/content/100/8/517)
Supplement: inline-supplementary-material-1 [file inline-supplementary-material-1.pdf]

**ALGORITHM TO DETERMINE PREMATURITY( SOP-001)**

For “case recruitment” This includes all women who have delivered an infant who is: stillborn (fresh or macerated), premature (< 37 weeks), low birth weight (<2500gm or 2.5kg) or have had their infant admitted to NICU in the preceding 48 hours.

A diagnosis of prematurity may be difficult to determine clinically between 34-37 weeks.

1.1.1 To determine the likelihood that an infant is preterm and their gestation the following information will be collected:

- LMP
- USS dating at any stage in pregnancy.
- Ballard score at birth.
- SFH collected during the second trimester.
- Birth weight

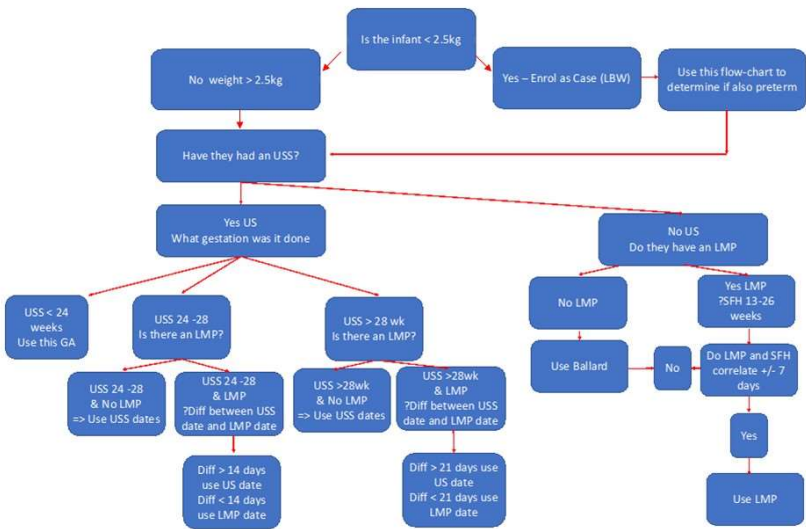

Results

142 (28%) of included women had an US during current pregnancy (n=30 before 24 weeks), 201 (29.5%) reported LMP and 315 (62%) reported SFH. Birth weight and Ballard scores were available for all live infants.
