# Supplementary material
Source: HighWire-hosted journal article supplement (https://sti.bmj.com/content/100/8/517)
Supplement: inline-supplementary-material-5 [file inline-supplementary-material-5.pdf]

**Supplementary Table 1. STI PCR positivity for samples collected from infants with clinical indication.**

|                    | NP swabs<br>n=117 (%) | Eye/skin swabs<br>n=4 (%) |
|--------------------|-----------------------|---------------------------|
| NG                 | 3 (2.6)               | 0 (0.0)                   |
| TV                 | 8 (6.8)               | 0 (0.0)                   |
| CT                 | 0 (0.0)               | 0 (0.0)                   |
| <i>T. pallidum</i> | 4 (3.4)               | 1 (25.0)                  |
